# Supplementary material for: PROMs after Lymphatic Reconstructive Surgery: Is There a Correlation between Volume Reduction and Quality of Life?
Source: PubMed Central journal article supplement — Plast Reconstr Surg Glob Open. 2023 May 26;11(5):e5020. doi: 10.1097/GOX.0000000000005020 (PMC10219699; doi:10.1097/gox.0000000000005020), 2023-05-26
Supplement: gox-11-e5020-s001.pdf [file gox-11-e5020-s001.pdf]

| <i><b>Versus</b></i>               | <b>Change in volume</b>                |                 |
|------------------------------------|----------------------------------------|-----------------|
| <b>Score / Domain</b>              | <b>Pearson correlation coefficient</b> | <b><i>p</i></b> |
| LYMPH Q / Symptoms                 | -0.30                                  | 0.56            |
| LYMPH Q / Function                 | -0.59                                  | 0.21            |
| LYMPH Q / Appearance               | -0.35                                  | 0.49            |
| LYMPH Q / Psychological            | -0.42                                  | 0.41            |
| LYMPH Q / Information              | -0.28                                  | 0.60            |
| LYMPH Q / Arm sleeve               | -0.41                                  | 0.43            |
| SF 36 / Physical functioning       | -0.54                                  | 0.27            |
| SF 36 / Role limitations physical  | -0.38                                  | 0.45            |
| SF 36 / Pain                       | -0.37                                  | 0.46            |
| SF 36 / General health             | -0.65                                  | 0.16            |
| SF 36 / Emotional well-being       | -0.60                                  | 0.21            |
| SF 36 / Role limitations emotional | -0.38                                  | 0.45            |
| SF 36 / Energy                     | -0.39                                  | 0.44            |
| SF 36 / Social functioning         | -0.60                                  | 0.21            |
| SF 36 / Health change              | -0.05                                  | 0.92            |
| quickDASH                          | 0.81                                   | 0.04*           |
