# Supplementary material for: PROMs after Lymphatic Reconstructive Surgery: Is There a Correlation between Volume Reduction and Quality of Life?
Source: PubMed Central journal article supplement — Plast Reconstr Surg Glob Open. 2023 May 26;11(5):e5020. doi: 10.1097/GOX.0000000000005020 (PMC10219699; doi:10.1097/gox.0000000000005020), 2023-05-26
Supplement: gox-11-e5020-s002.pdf [file gox-11-e5020-s002.pdf]

| <i><b>Versus</b></i>               | <b>Change in volume</b>                |                 |
|------------------------------------|----------------------------------------|-----------------|
| <b>Score / Domain</b>              | <b>Pearson correlation coefficient</b> | <b><i>p</i></b> |
| LYMPH ICF / Physical function      | -0.21                                  | 0.50            |
| LYMPH ICF / Mental function        | -0.09                                  | 0.77            |
| LYMPH ICF / General tasks          | -0.37                                  | 0.21            |
| LYMPH ICF / Mobility activities    | -0.09                                  | 0.77            |
| LYMPH ICF / Social life            | -0.55                                  | 0.05            |
| LYMPH ICF / Overall score          | -0.28                                  | 0.36            |
| SF 36 / Physical functioning       | -0.25                                  | 0.42            |
| SF 36 / Role limitations physical  | 0.29                                   | 0.33            |
| SF 36 / Pain                       | 0.33                                   | 0.27            |
| SF 36 / General health             | -0.24                                  | 0.43            |
| SF 36 / Emotional well-being       | 0.04                                   | 0.91            |
| SF 36 / Role limitations emotional | 0.14                                   | 0.64            |
| SF 36 / Energy                     | -0.39                                  | 0.44            |
| SF 36 / Social functioning         | 0.16                                   | 0.61            |
| SF 36 / Health change              | -0.07                                  | 0.82            |
| LEFS                               | -0.15                                  | 0.65            |
